# Supplementary material
Source: PubMed Central journal article supplement (PMC2893238)
Supplement: NIHMS203138-supplement-1.pdf [file NIHMS203138-supplement-1.pdf]

## STIMULUS-DRIVEN COMPETITION IN A CHOLINERGIC MIDBRAIN NUCLEUS

Ali Asadollahi, Shreesh P. Mysore and Eric I. Knudsen

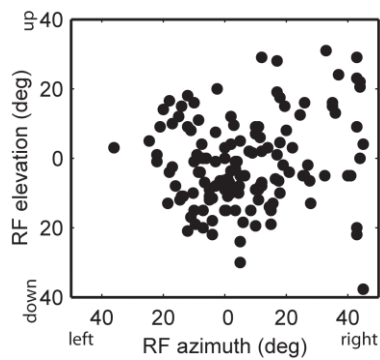

**Supplementary Figure 1. Distribution of receptive field centers for the sampled population of lpc units tested with looming stimuli (n=147).** RF centers ranged in azimuth from left 36° to right 45° and in elevation from -38° to +31°.

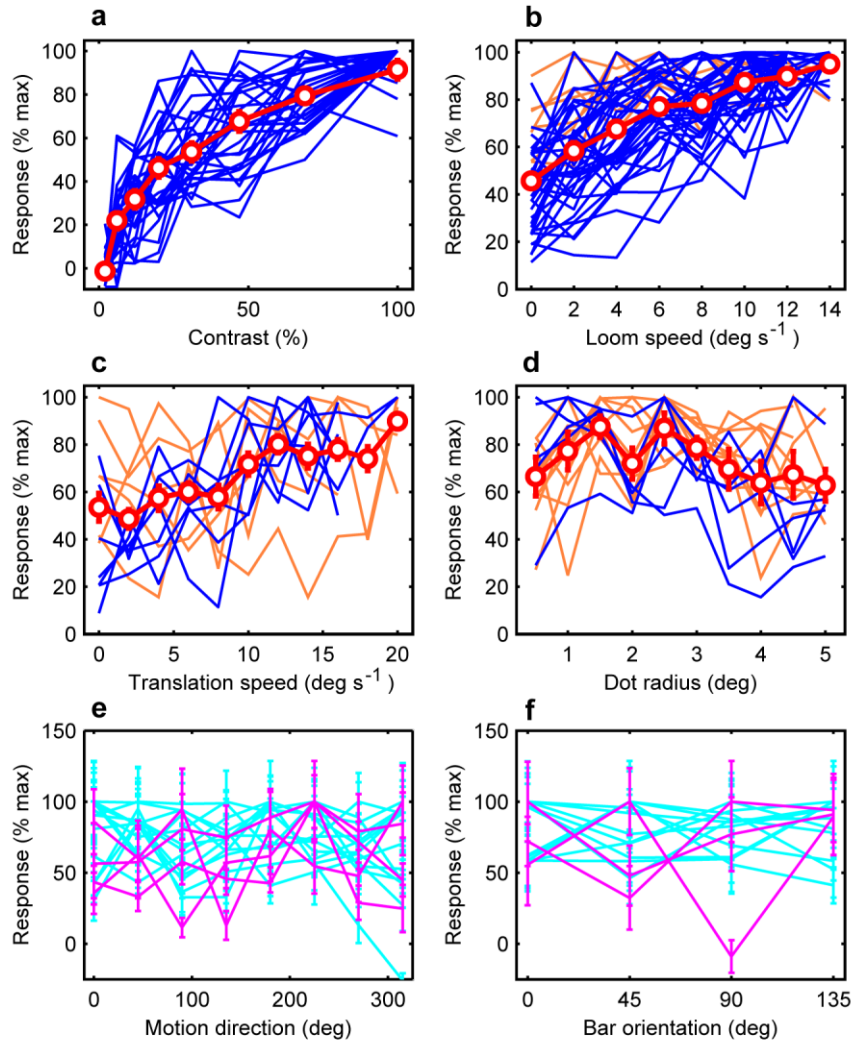

**Supplementary Figure 2. Response functions of lpc units to different features presented alone at the center of the RF. a)** Contrast of stationary dot, 1.5° radius. **b)** Loom speed of a full contrast dot. **c)** Translation speed, 1.5° dot, full contrast. **d)** Dot radius, full contrast. **e)** Motion direction, 1.5° radius dot, full contrast, 0° = straight up. **f)** Bar orientation, 4° length and 1° width bar, full contrast, 0° orientation refers to horizontal bar. Red circles in **a-d**: mean and s.e.m.; blue curves in **a-d**: response function for each unit exhibiting a significant response correlation with stimulus strength (correlation analysis,  $P < 0.05$ ); orange curves in **a-d**: response function for each unit with

non-significant response correlation with stimulus strength (correlation analysis,  $P > 0.05$ ). Magenta curves in **e** and **f**: significant modulation (Kruskal-Wallis test,  $P < 0.05$ ); Cyan curves in **e** and **f**: non-significant modulation (Kruskal-Wallis test,  $P > 0.05$ ). Error bars indicate s.e.m.

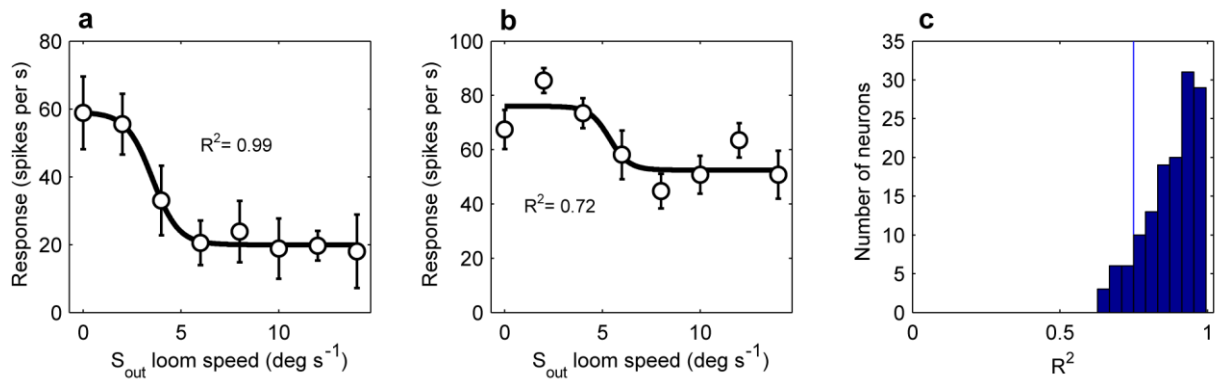

**Supplementary Figure 3. R-Squared assessments of goodness of sigmoidal fits to competitor strength-response profiles. a)** Responses that were fit well ( $R^2=0.99$ ). **b)** Responses that were fit poorly ( $R^2=0.72$ ; not included in further analysis). **c)** Distribution of  $R^2$  values for 135 neurons. Only responses for which fits exceeded the criterion of  $R^2 > 0.75$  (vertical line) were included in analyses. Error bars indicate s.e.m.

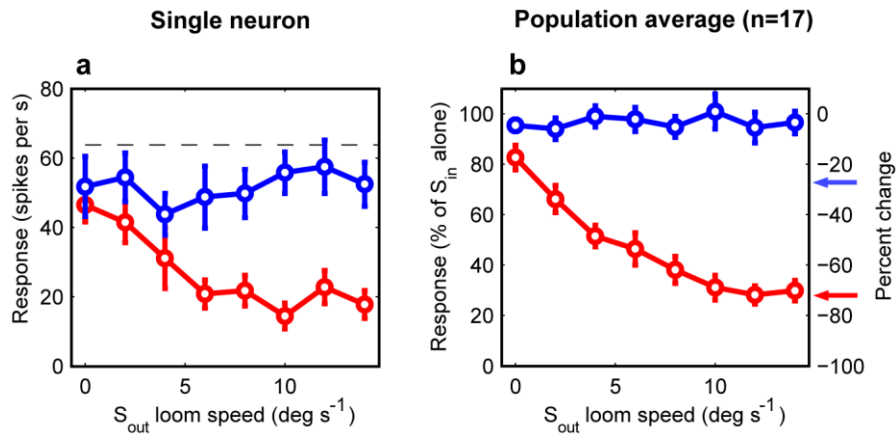

**Supplementary Figure 4. Competitor strength-response profiles with the competitor in the same or opposite hemifield as the  $S_{in}$  stimulus.** All RF centers were located  $<15^\circ$  azimuth. Red circles:  $S_{out}$  in the same hemifield as  $S_{in}$ ; blue circles:  $S_{out}$  in the opposite hemifield as  $S_{in}$ . **a)** Data from a single unit. Horizontal dashed line: response to the  $S_{in}$  alone. **b)** Population averages (n=17). Units with  $S_{out}$  in the same hemifield (red curve) and opposite hemifield as the  $S_{in}$  stimulus. The arrows on the right side show the % changes of responses by  $S_{out}$  observed when they were measured with the global spatial interaction profile in Figure 4. Error bars indicate s.e.m.

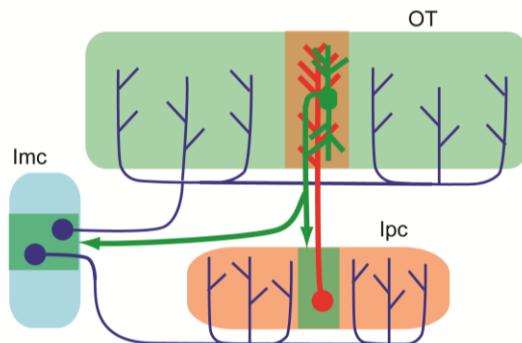

**Supplementary Figure 5. Schematic drawing of the isthmotectal circuit in birds.**

OT: optic tectum, Ipc: nucleus isthmi pars parvocellularis, Imc: nucleus isthmi pars magnocellularis. Based on data from reference 15.

**Supplementary Table 1: Combinations of features tested as  $S_{in}$  or  $S_{out}$  stimuli**

| $S_{in} / S_{out}$    | Combinations Tested | Responses correlated with $S_{out}$ strength<br>correlation analysis, $P < 0.05$ | Responses suppressed equally by all $S_{out}$ values<br>Kruskal-Wallis, $P < 0.05$ | No effect of $S_{out}$ |
|-----------------------|---------------------|----------------------------------------------------------------------------------|------------------------------------------------------------------------------------|------------------------|
| Total                 | 190                 | 174                                                                              | 3                                                                                  | 13                     |
| Contrast/<br>Contrast | 28                  | 25                                                                               | 1                                                                                  | 2                      |
| Loom/Loom             | 147                 | 135                                                                              | 2                                                                                  | 10                     |
| Move/Loom             | 2                   | 2                                                                                | 0                                                                                  | 0                      |
| Loom/Move             | 3                   | 2                                                                                | 0                                                                                  | 1                      |
| Move/Move             | 3                   | 3                                                                                | 0                                                                                  | 0                      |
| Loom/Auditory         | 7                   | 7                                                                                | 0                                                                                  | 0                      |
